# Supplementary material for: Real-World Evidence of Factors Affecting Cannabidiol Exposure in Children with Drug-Resistant Developmental and Epileptic Encephalopathies
Source: MDPI journal article supplement (doi:10.3390/pharmaceutics15082120), 2023-08-10
Supplement: s1 [file s1]

**Table S2. Clinical, demographic, and pharmacokinetic characteristics in relation to seizure control**

| Characteristic/parameter   | Percentage decrease in seizure frequency |                   |
|----------------------------|------------------------------------------|-------------------|
|                            | 50-74%                                   | 75-99%            |
| Sex (female/male), n       | 12/5                                     | 3/2               |
| Age, years                 | 13.0 (4.7-16.6)                          | 12.4 (10.1-17.2)  |
| CBD C0, ng/mL              | 37.3 (3.5-188.3)                         | 60.7 (31.9-366.3) |
| CBD daily dose, mg/kg/day  | 7.9 (2.6-22.5)                           | 8.5 (3.7-15.3)    |
| Epileptic syndrome, n (%)  |                                          |                   |
| LGS                        | 9 (53.0)                                 | 2 (40)            |
| MAE                        | 4 (23.5)                                 | 1 (20)            |
| CSWSS                      | -                                        | 2 (40)            |
| WS                         | 2 (11.7)                                 | -                 |
| Myoclonic epilepsy         | 1 (5.9)                                  | -                 |
| Frontal epilepsy           | 1 (5.9)                                  |                   |
| Number of AEDs             | 4±2                                      | 3±2               |
| Other interventions n, (%) |                                          |                   |
| Ketogenic diet             | 3 (17.6)                                 | 2 (4.0)           |
| Vagus nervous stimulation  | 3 (17.6)                                 | -                 |

\*Continuous data are expressed as median (range)

Abbreviations: AED, antiepileptic drug; C0, cannabidiol trough concentration; CBD, cannabidiol; CSWSS, continuous spikes and waves during slow sleep; LGS, Lennoux-Gastaut syndrome; MAE, myoclonic atonic epilepsy, WS, West syndrome
