# Supplementary material for: Real-World Evidence of Factors Affecting Cannabidiol Exposure in Children with Drug-Resistant Developmental and Epileptic Encephalopathies
Source: MDPI journal article supplement (doi:10.3390/pharmaceutics15082120), 2023-08-10
Supplement: s1 [file s1]

**Table S1. Full description of the enrolled patients**

| <b>ID</b> | <b>Sex/<br/>Age,<br/>years</b> | <b>Ht, cm/<br/>Wt, kg</b> | <b>Epileptic<br/>syndrome</b> | <b>Concomitant drugs<br/>(dose, mg/day)</b>                                                      | <b>CBD dose,<br/>mg/kg/day</b> | <b>CBD<br/>C0,<br/>ng/ml <sup>a</sup></b> | <b>Other<br/>treatment</b> |
|-----------|--------------------------------|---------------------------|-------------------------------|--------------------------------------------------------------------------------------------------|--------------------------------|-------------------------------------------|----------------------------|
| <b>1</b>  | F/13.4                         | 140/33.2                  | LGS                           | LEV (2500), ZNS (100), TPM (200), SLT (300)                                                      | 10.5                           | 70.6                                      | VNS                        |
| <b>1</b>  | F/13.8                         | 140/34.0                  | LGS                           | T4 (37.5)*, LEV (2500), ZNS (100), TPM (200), SLT (300)                                          | 10.3                           | 99.4                                      | VNS                        |
| <b>2</b>  | F/14.9                         | 155/60                    | CSWSS                         | T4 (100) *, SLT (400), ETS (500), CLN (0.5)                                                      | 5.0                            | 31.9                                      | -                          |
| <b>3</b>  | F/11.9                         | 143/38.5                  | LGS                           | LEV (3000), ZNS (400), CLB (30), VPA (750)                                                       | 11.7                           | 188.3                                     | KD                         |
| <b>4</b>  | M/7.8                          | 104/18.2                  | LGS                           | LEV (3000), ZNS (100), CLB (20), DZP (10)                                                        | 19.2                           | 37.3                                      | -                          |
| <b>5</b>  | F/10.1                         | 119/20.6                  | CSWSS                         | T4 (37.5) *, SLT (400), CLB (20), ETS (500), DZP (20), BAC (20)                                  | 14.6                           | 353.0                                     | KD                         |
| <b>5</b>  | F/10.5                         | 122/19.6                  | CSWSS                         | T4 (37.5) *, SLT (400), CLB (20), ETS (500), DZP (20), BAC (20)                                  | 15.3                           | 366.3                                     | KD                         |
| <b>6</b>  | M/17.2                         | 155/35.2                  | LGS                           | T4 (50) *, LEV (3000), ZNS (100), TPM (50), SLT (600), CLB (30), ETS (500), RUF (800), OMEP (10) | 14.2                           | 317.5                                     | VNS                        |
| <b>7</b>  | F/7.8                          | 118/21                    | WS                            | LEV (1000), TPM (75)                                                                             | 7.1                            | 19.2                                      | -                          |
| <b>8</b>  | F/13.7                         | 127/38                    | MAE                           | LEV (2500), TPM (300), BAC (30), LCM (400), LRZ (2)                                              | 4.2                            | 16.9                                      | -                          |
| <b>9</b>  | F/11.2                         | 105/11.4                  | WS                            | LEV (1500), ZNS (600), BAC (10), OMEP (10), LEVOM (3.125)                                        | 8.8                            | 3.5                                       | -                          |
| <b>10</b> | M/12.5                         | 135.5/33.6                | MAE                           | LEV (1000), ZNS (100), SLT (200), CLB (30), RUF (400), RISP (1)                                  | 8.9                            | 48.2                                      | VNS                        |
| <b>11</b> | F/13.6                         | 143/70                    | LGS                           | LEV (4000), SLT, (600) CLB (20), VPA (500)                                                       | 7.9                            | 53.9                                      | -                          |
| <b>12</b> | M/4.7                          | 104.5/20                  | MAE                           | LEV (2000), TPM (50), RUF (1400), RISP (4)                                                       | 22.5                           | 82.7                                      | -                          |

|    |        |            |                    |                                                                  |      |       |         |
|----|--------|------------|--------------------|------------------------------------------------------------------|------|-------|---------|
| 13 | F/13.4 | 130/38.5   | LGS                | LEV (2500), RUF (800), LRZ (6)                                   | 2.6  | 6.4   | -       |
| 14 | F/12.1 | 141/40.5   | LGS                | LEV (3000), SLT (400), CLB (20), VPA (1500)                      | 3.7  | 46.7  | KD, VNS |
| 14 | F/12.4 | 144/42     | LGS                | T4 (50)*, LEV (3000), SLT (400), CLB (20), VPA (1500)            | 6.0  | 101.9 | KD, VNS |
| 15 | F/16.6 | 152/35     | MAE                | LEV (3000), SLT (600), VPA (500)                                 | 11.4 | 90.3  | -       |
| 16 | F/13.0 | 147/32.5   | LGS                | LEV (3000), TPM (350), CLB (25), RUF (600)                       | 4.0  | 8.6   | -       |
| 17 | F/12.2 | 124.6/50   | LGS                | T4 (37.5) *, LEV (3000), LTG (100), CLB (20)                     | 11.0 | 79.1  | -       |
| 18 | F/13.1 | 141/38.6   | LGS                | LEV (3000), TPM (300), SLT (200), DZP (8), LEVOM (75), LCM (150) | 5.2  | 30.0  | KD      |
| 19 | M/14.6 | 143/32.5   | Myoclonic epilepsy | LEV (2500), TPM (400), SLT (400), DZP (7.5), BAC (50)            | 3.1  | 36.3  | -       |
| 20 | M/7.2  | 119.5/28.6 | LGS                | T4 (50)*, LEV (2500), SLT (200), VPA (1250)                      | 5.2  | 47.0  | KD, VNS |
| 21 | M/12.8 | 142/53     | MAE                | LEV (1000), ZNS (200), CLB (20)                                  | 8.5  | 60.7  | -       |
| 22 | F/15.6 | 158/41     | Frontal epilepsy   | LEV (2000), LTG (200), TPM (300)                                 | 4.9  | 32.2  | -       |

\*Two C0 values are reported in those cases that patients were studied on two occasions.

\*Doses are expressed as µg/day

**Abbreviations:** BAC, baclofen; C0: cannabidiol trough concentration; CBD: cannabidiol; CLB, clobazam; CSWSS: continuous spikes and waves during slow sleep; D: dose; DZP, diazepam; ETS, ethosuximide; F, female; KD, ketogenic diet; LCM, lacosamide; LEV, levetiracetam; LEVOM, levomepromazine; LGS: Lennox Gastaut syndrome; LRZ, lorazepam; LTG, lamotrigine; MAE: myoclonic-atonic epilepsy; M, male; OMEP, omeprazole; RISP, risperidone; RUF, rufinamide; T4, levothyroxine; SLT, sulthiame; TPM, topiramate; VNS, vagus nerve stimulation; VPA, valproic acid; WS, West syndrome; ZNS, zonisamide
